# Supplementary material
Source: PubMed Central journal article supplement (PMC9004390)
Supplement: aem.00256-22-s0001.pdf [file aem.00256-22-s0001.pdf]

## **Supplement materials**

### **Enzymatic Verification and Comparative Analysis of Carrageenans Metabolism Pathways in Marine Bacterium *Flavobacterium algicola***

Chengcheng Jiang<sup>a</sup>, Hong Jiang<sup>a</sup>, Tianyu Zhang<sup>a</sup>, Zewei Lu<sup>a</sup>, Xiangzhao  
Mao<sup>a,b \*</sup>

<sup>a</sup>College of Food Science and Engineering, Ocean University of China,  
Qingdao 266003, China

<sup>b</sup>Laboratory for Marine Drugs and Bioproducts of Qingdao National  
Laboratory for Marine Science and Technology, Qingdao 266237, China,

\*Corresponding author: Xiangzhao Mao

Address: College of Food Science and Engineering, Ocean University of  
China, Qingdao 266003, China

Tel.: +86-532-82032660

Fax: +86-532-82031789

E-mail: xzhmao@ouc.edu.cn

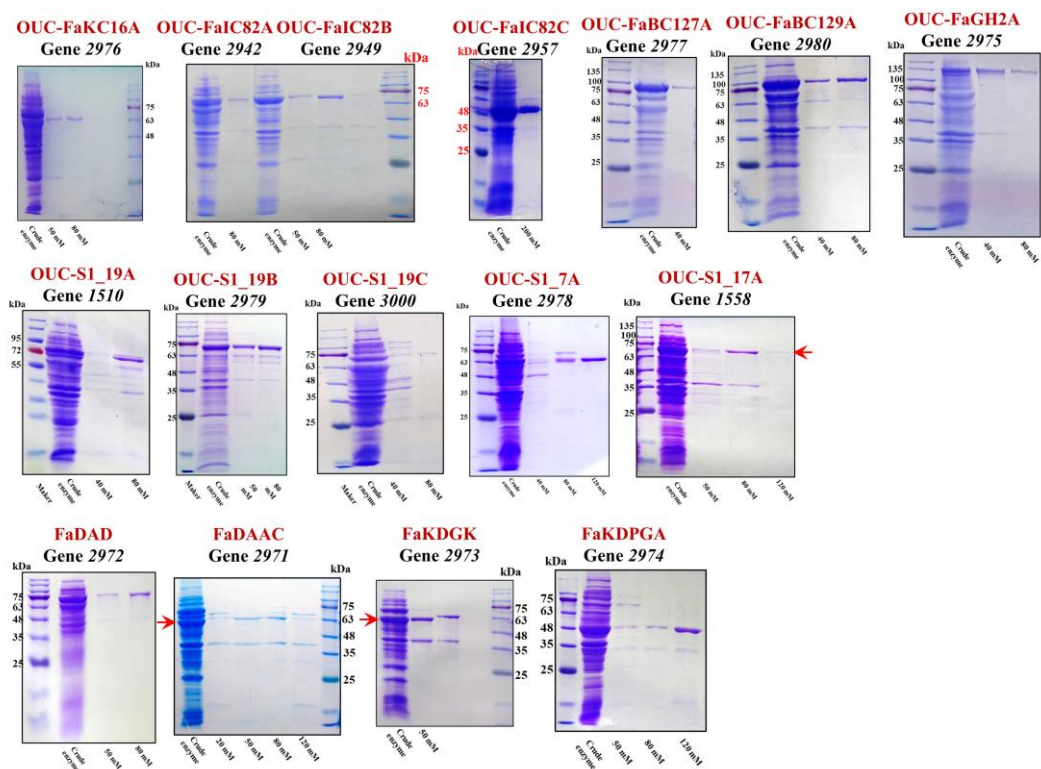

FIG S1 SDS-PAGE analyses of the purified enzymes involved the KC and IC metabolism in *F. algicola*.

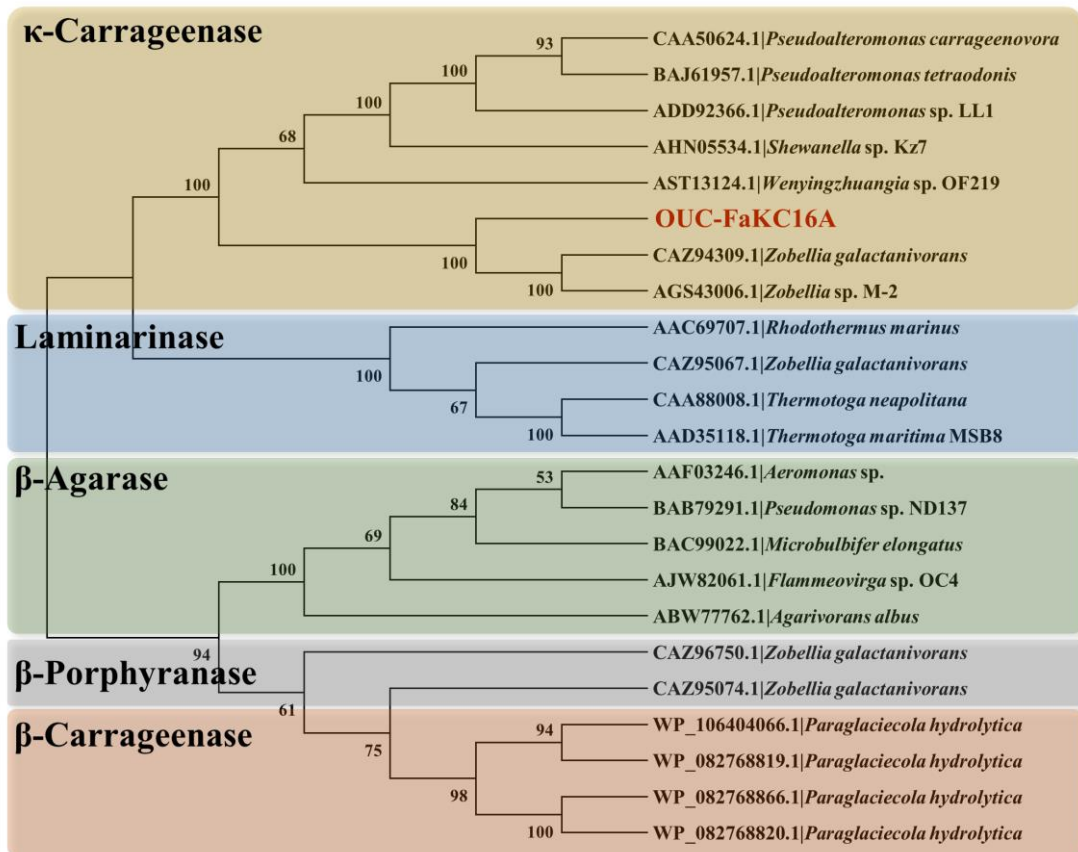

**FIG S2** Sequence-based relationship of gene 2976 encoded  $\kappa$ -carrageenase OUC-FaKC16A from *F. algalicola* with other characterized GH16 hydrolases. Accession number and taxonomy is indicated for each protein. The  $\beta$ -agarases,  $\beta$ -porphyranases,  $\kappa$ -carrageenases, and laminarinases represent characterized enzymes according to the CAZy database.

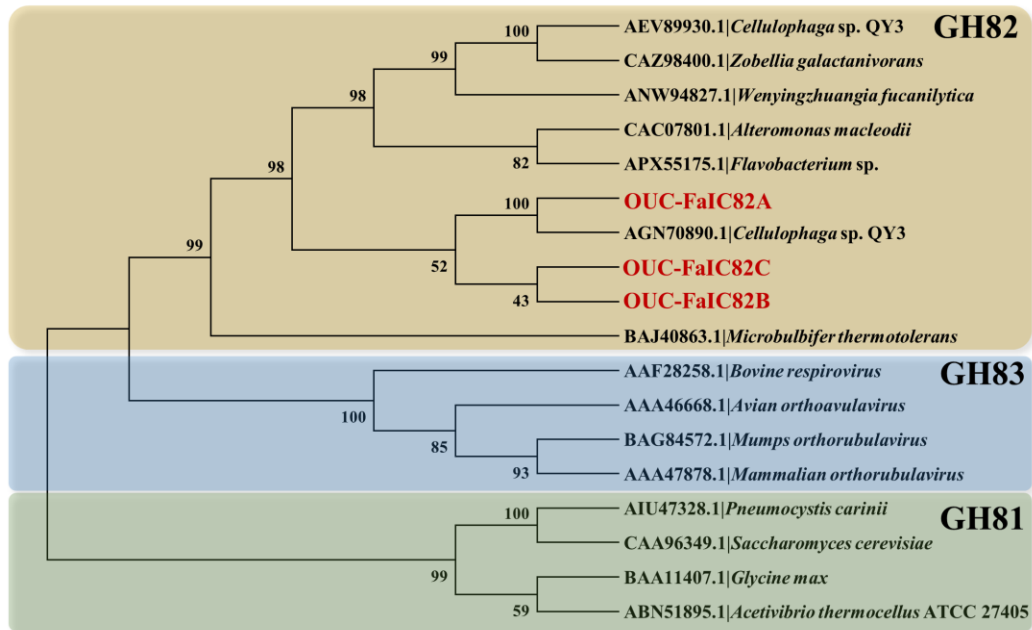

**FIG S3** Sequence-based relationship of gene 2942, 2949, and 2957 encoded t-carrageenases OUC-FaIC82A, OUC-FaIC82B, and OUC-FaIC82C, respectively, from *F. algicola* with other characterized GH1, GH2, and GH3 hydrolases. Accession number and taxonomy is indicated for each protein. The sequences of characterized enzymes were obtained from CAZy database.

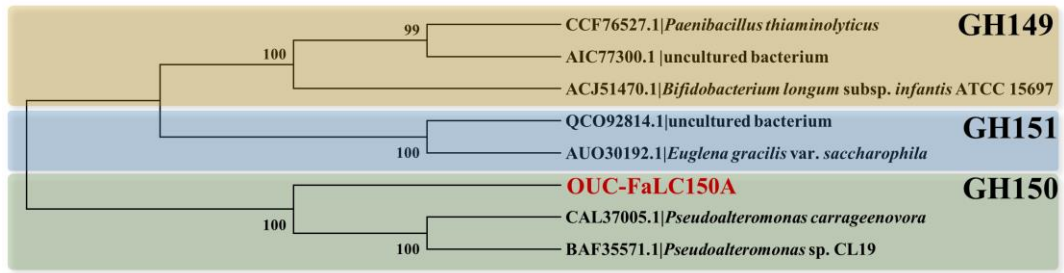

**FIG S4** Sequence-based relationship of gene 2941 encoded  $\lambda$ -carrageenase OUC-FaLC150A from *F. algicola* with other characterized GH149, GH150, and GH151 hydrolases. Accession number and taxonomy is indicated for each protein. The sequences of characterized enzymes were obtained from CAZy database.

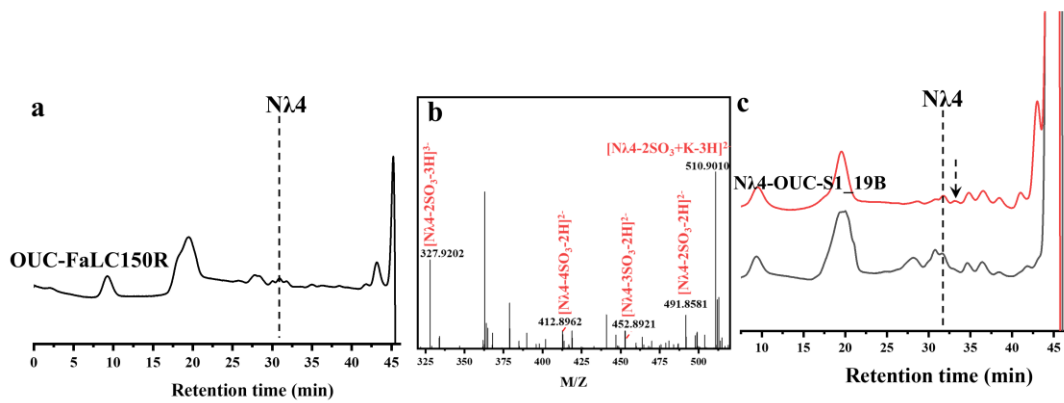

**FIG S5** (c) HPLC for analyzing the main products of OUC-FaLC150A from hydrolyzing LC. (d) MS for analyzing the end products of OUC-FaLC150A from hydrolyzing IC for 24 h. (c) HPLC for analyzing the ability of OUC-S1\_19B to remove the G4S group from Nλ4. LC: λ-carrageenan; Nλ4: λ-neocarratetrose; G4S: C4 hydroxyl sulfated D-galactose residue

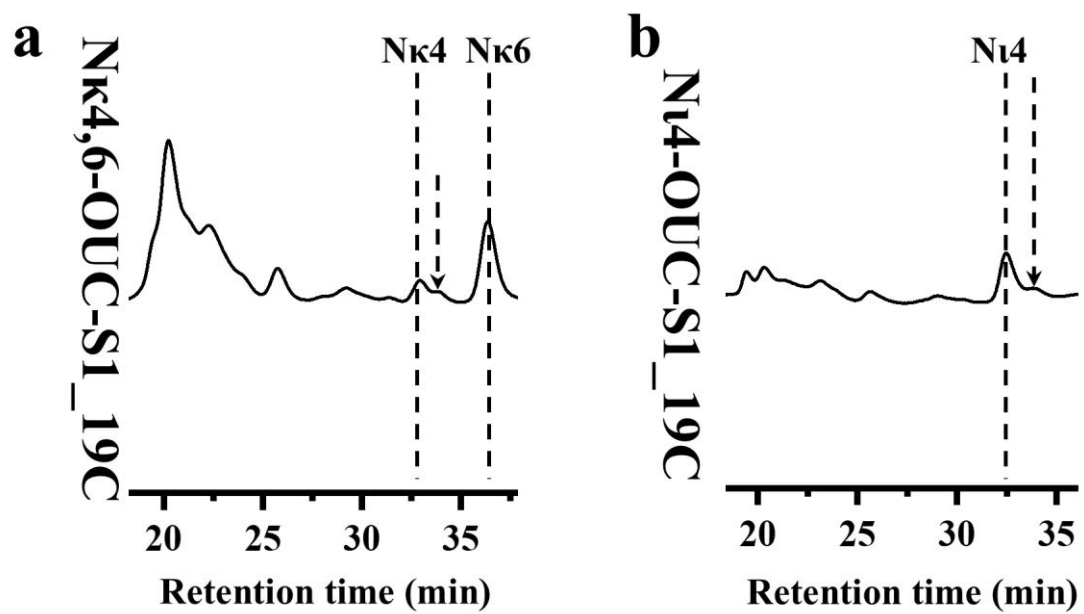

**FIG S6** (a) HPLC analysis of the activities of OUC-S1\_19A (encoded by gene *3000*) for removing the G4S group from the mixture of N $\kappa$ 4 and N $\kappa$ 6. (b) HPLC analysis of the activity of OUC-S1\_19A for removing the G4S group from N $\iota$ 4. G4S: C4 hydroxyl sulfated D-galactose residue; N $\kappa$ 4:  $\kappa$ -neocarratetrose; N $\kappa$ 6:  $\kappa$ -neocarrahexaose; N $\iota$ 4:  $\iota$ -neocarratetrose

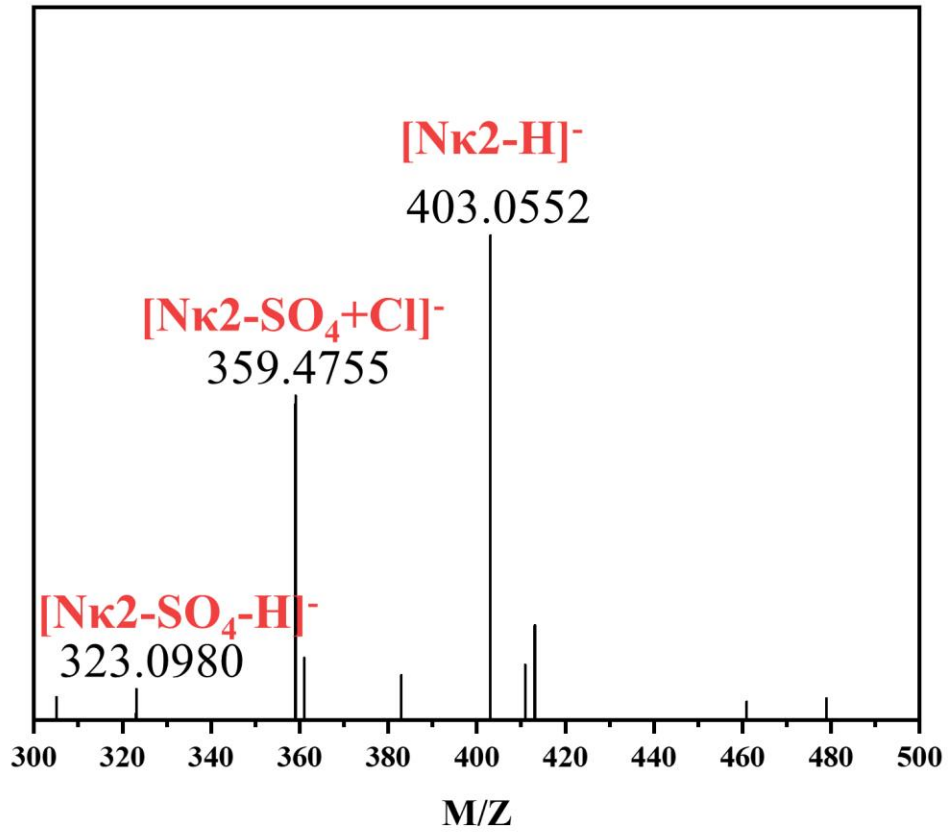

**FIG S7** HPLC analysis of the activities of d OUC-S1\_19B for removing the G4S group from the mixture of N $\kappa$ 2. G4S: C4 hydroxyl sulfated D-galactose residue; N $\kappa$ 2:  $\kappa$ -neocarrabiose



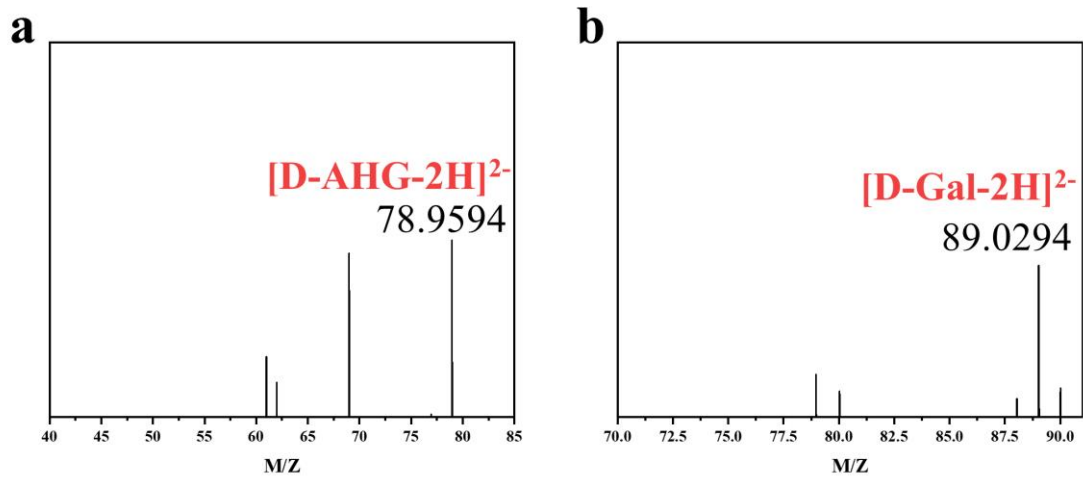

**FIG S8** (a) MS analysis of the D-AHG production from OUC-FaBC127A and OUC-FaBC129A hydrolysis of the OUC-S1\_19B-treated Nκ4. (b) MS analysis of the D-Gal production from OUC-FaGH2A hydrolysis of the COS with DP3 (G-DA-G4S). ADAG: α-3,6-anhydro-D-galactosidase; BG: β-galactosidase; Nκ4: κ-neocarratetrose; D-AHG: 3,6-anhydro-D-galactose; D-Gal: D-galactose

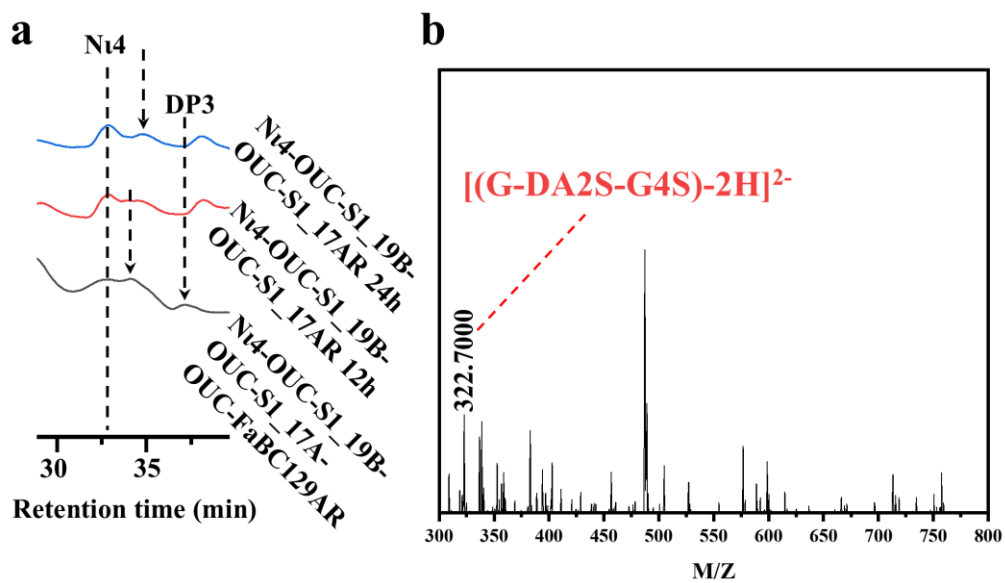

**FIG S9** The HPLC (a) and MS (b) analyses of the DP3 (G-DA2S-G4S) products from hydrolyzing Ni4 which treated successively with OUC-S1\_19B and OUC-S1\_17A by OUC-FaBC129A

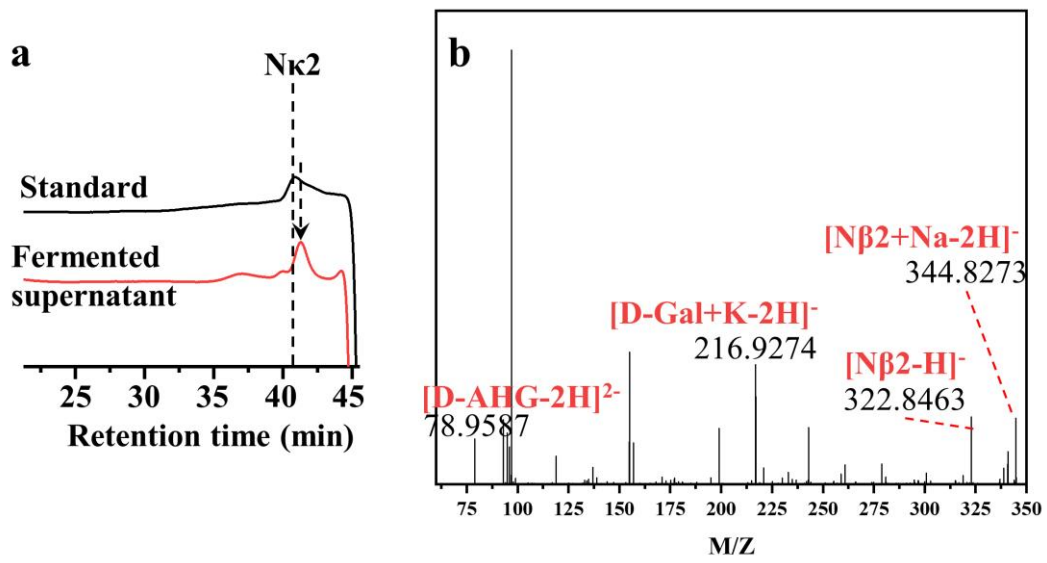

**FIG S10** The HPLC (a) and MS (b) analyses of fermented supernatant of *F. algicola* collected from M9 medium with KC as the sole carbon source.  $N_{\kappa 2}$ :  $\kappa$ -neocarrabiose; D-AHG: 3,6-anhydro-D-galactose; D-Gal: D-galactose

**Table S1** The BLAST results of carrageenases of *F. algicola* with the closest characterized enzymes from NR databases

| Gene | Protein      | CAZy family                    | Accession no. of closest characterized protein                             | Percent Identity | Query Coverage |
|------|--------------|--------------------------------|----------------------------------------------------------------------------|------------------|----------------|
| 2976 | OUC-FaKC16A  | GH16, $\kappa$ -carrageenase   | CAZ94309.1, $\kappa$ -carrageenase                                         | 60%              | 68%            |
| 2942 | OUC-FaIC82A  | GH82, $\iota$ -carrageenase    | AGN70890.1, $\iota$ -carrageenase                                          | 56%              | 88%            |
| 2949 | OUC-FaIC82B  | GH82, $\iota$ -carrageenase    | APX55175.1, $\iota$ -carrageenase                                          | 28%              | 98%            |
| 2957 | OUC-FaIC82C  | GH82, $\iota$ -carrageenase    | APX55175.1, $\iota$ -carrageenase                                          | 37%              | 96%            |
| 2941 | OUC-FaLC150A | GH150, $\lambda$ -carrageenase | BAF35571.1, $\lambda$ -carrageenase<br>CAL37005.1, $\lambda$ -carrageenase | 45%              | 99%            |

**Table S2** The BLAST results of sulfatases, oligosaccharide glycosidases, and D-AHG utilization related enzymes of *F. algicola* with the reported enzymes involved the carrageenan metabolism of the *Zobellia galactanivorans* Dsij<sup>T</sup> and *Pseudoalteromonas* species

| Gene | Protein      | Accession no. of closest characterized protein                                          | Percent Identity | Query Coverage |
|------|--------------|-----------------------------------------------------------------------------------------|------------------|----------------|
| 1510 | OUC-S1_19A   | CAZ97290.1, exo-acting G4S N <sub>κ</sub> COS sulfatase S1_19B                          | 37%              | 79%            |
| 1558 | OUC-S1_17A   | KAA1157105.1, S1_17 DA2S-sulfatase ZGAL_3151                                            | 56%              | 88%            |
| 2064 | OUC-S1_17B   | CAZ97290.1, S1_17 DA2S-sulfatase ZGAL_3151                                              | 36%              | 81%            |
| 2978 | OUC-S1_7A    | CAZ97285.1, S1_7 KC G4S-sulfatase                                                       | 55%              | 98%            |
| 2979 | OUC-S1_19B   | CAZ97284.1, S1_19 N <sub>κ</sub> COS G4S-sulfatase                                      | 65%              | 94%            |
|      |              | KAA1157105.1, KC/IC G4S-sulfatase                                                       | 53%              | 99%            |
| 3000 | OUC-S1_19C   | CAZ97284.1, S1_19 N <sub>κ</sub> COS G4S-sulfatase KAA1157105.1,<br>KC/IC G4S-sulfatase | 59%              | 95%            |
|      |              |                                                                                         | 56%              | 97%            |
| 2977 | OUC-FaBC127A | CAZ97289.1, GH127 ADAG                                                                  | 67%              | 93%            |
| 2980 | OUC-FaBC129A | CAZ97291.1, GH129-like ADAG                                                             | 64%              | 99%            |
| 2971 | FaDAAC       | CAZ97295.1, 3,6-anhydro-D-galactonate cycloisomerase                                    | 56%              | 97%            |
| 2972 | FaDAD        | CAZ97294.1, 3,6-anhydro-D-galactose dehydrogenase                                       | 73%              | 98%            |
| 2973 | FaKDGK       | CAZ97293.1, KDGal kinase                                                                | 48%              | 98%            |
| 2974 | FaKDPGA      | CAZ97292.1, KDPGal aldolase                                                             | 64%              | 97%            |
